# Supplementary material for: Using mixed methods to evaluate efficacy and user expectations of a virtual reality–based training system for upper-limb recovery in patients after stroke: a study protocol for a randomised controlled trial
Source: PubMed Central journal article supplement (PMC4167274; doi:10.1186/1745-6215-15-350), 2014-09-06
Supplement: 13063_2014_2223_MOESM1_ESM.pdf [file 13063_2014_2223_MOESM1_ESM.pdf]

**Additional file 1: Interview guide patient interviews.**

| <b>Sequence</b>          | <b>Topic</b>                          | <b>Question</b>                                                                                                                                                                                                                                                                                                                                                                                                                                                                                                                                                                                                                     |
|--------------------------|---------------------------------------|-------------------------------------------------------------------------------------------------------------------------------------------------------------------------------------------------------------------------------------------------------------------------------------------------------------------------------------------------------------------------------------------------------------------------------------------------------------------------------------------------------------------------------------------------------------------------------------------------------------------------------------|
| <b>Introduction</b>      | About the stroke                      | Welcome statement<br>When was your stroke?<br>How do you feel today?<br>What is the main problem for you today with your arm?                                                                                                                                                                                                                                                                                                                                                                                                                                                                                                       |
|                          | Prior experience with virtual reality | What prior experiences have you had with virtual training?<br>Do you have any prior knowledge of virtual training?<br>How comfortable did you feel with computer systems prior to your stroke?                                                                                                                                                                                                                                                                                                                                                                                                                                      |
| <b>Main part</b>         | Virtual reality training system       | What have you experienced with the YouGrabber?                                                                                                                                                                                                                                                                                                                                                                                                                                                                                                                                                                                      |
|                          | Start of the intervention             | How was your first experience with YouGrabber?<br>What did you expect from the first session?<br>How did you feel during the first session?<br>What did you expect from the first intervention?                                                                                                                                                                                                                                                                                                                                                                                                                                     |
|                          | Virtual reality training system       | What were your apprehensions concerning that intervention?<br>What did you like/dislike in the intervention?<br>What was easy/difficult at the beginning with the device?<br>What was the main experience with YouGrabber?<br>How did you like it?<br>How, in your opinion, can YouGrabber help you to achieve your goals?<br>What do you think about the YouGrabber intervention?<br>How did you feel during and after the intervention?<br>What did you expect at the end of the training program?<br>Have your expectations changed?<br>What were your concerns at the end of the training session?<br>Did your concerns change? |
|                          | Motor function                        | Did something (arm function) change over the training period? (in the therapy, in daily life, at home?)                                                                                                                                                                                                                                                                                                                                                                                                                                                                                                                             |
|                          | Virtual reality training system       | What was easy/difficult at the end of the training program?                                                                                                                                                                                                                                                                                                                                                                                                                                                                                                                                                                         |
|                          | Therapist role                        | What was the therapist role?                                                                                                                                                                                                                                                                                                                                                                                                                                                                                                                                                                                                        |
|                          | Virtual reality training system       | What would you have changed, if anything?                                                                                                                                                                                                                                                                                                                                                                                                                                                                                                                                                                                           |
| <b>Closing questions</b> | Virtual reality training system       | Any comments or do you want to add something?<br>If you could change anything in the intervention or the device, what would it be?                                                                                                                                                                                                                                                                                                                                                                                                                                                                                                  |
|                          | Interview                             | Final summary from the researcher and the participant.<br>How did you feel about the interview? (stressful, agreeable, difficult)                                                                                                                                                                                                                                                                                                                                                                                                                                                                                                   |
