# Supplementary material for: Using mixed methods to evaluate efficacy and user expectations of a virtual reality–based training system for upper-limb recovery in patients after stroke: a study protocol for a randomised controlled trial
Source: PubMed Central journal article supplement (PMC4167274; doi:10.1186/1745-6215-15-350), 2014-09-06
Supplement: 13063_2014_2223_MOESM2_ESM.pdf [file 13063_2014_2223_MOESM2_ESM.pdf]

**Additional file 2: Interview guide therapist focus groups.**

| Sequence                 | Topic                                                  | Question                                                                 |
|--------------------------|--------------------------------------------------------|--------------------------------------------------------------------------|
| <b>Introduction</b>      | Virtual reality training system                        | What are your general experiences on the YG System?                      |
| <b>Main part</b>         |                                                        | What was your expectation before first YG Training?                      |
|                          | How did you experience the patients on the YouGrabber? |                                                                          |
| <b>Closing questions</b> | Virtual Reality                                        | What developments did you notice at the patients?                        |
|                          |                                                        | What changes did you remark in the handling of the YouGabber?            |
|                          |                                                        | How did you as a therapist feel during the YG Trainings?                 |
|                          |                                                        | What risks do you see in the treatment with VR?                          |
|                          |                                                        | What chances do you see in the treatment with VR?                        |
|                          |                                                        | How do you appraise future possibilities of VR in stroke rehabilitation? |
|                          |                                                        | Do you have something to complete?                                       |
|                          |                                                        | How do you think about the interview?                                    |
